# Supplementary material for: Soil fauna: key to new carbon models
Source: Copernicus journal article supplement (doi:10.5194/soil-2016-19), 2016-04-14
Supplement: Supplementary file [file soil-2016-19-AC1-supplement.pdf]

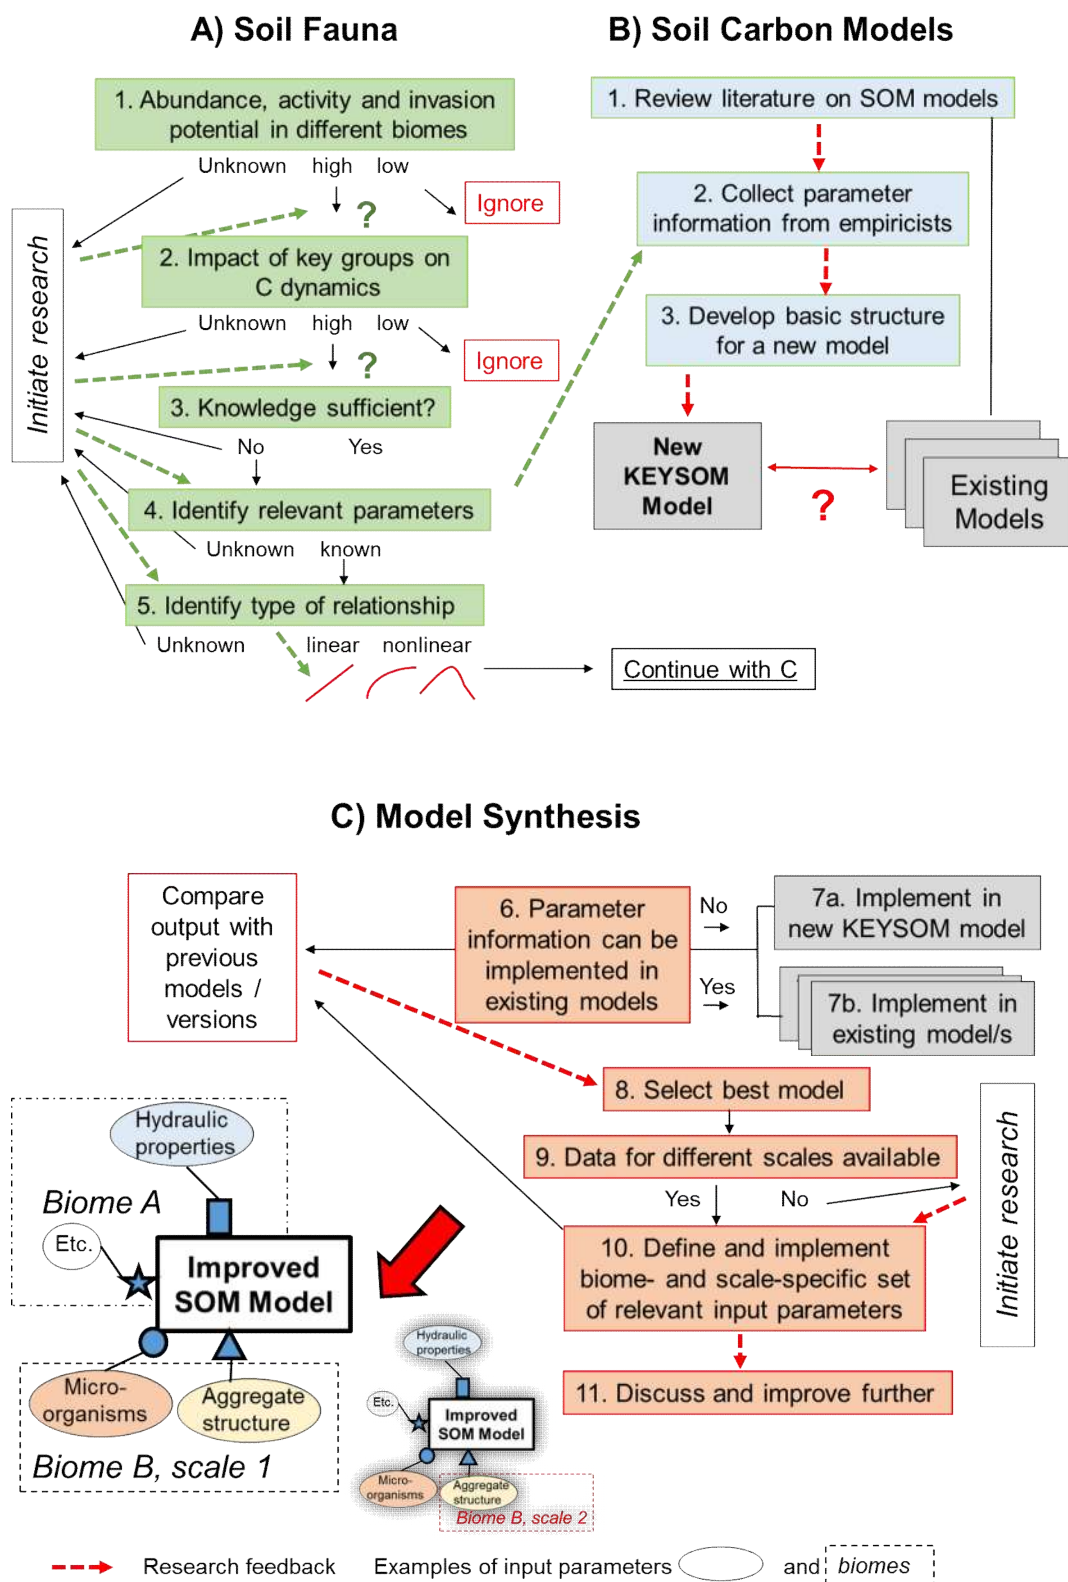

**Figure 3:** Flow scheme for an improved understanding of the role of soil fauna for soil organic matter (SOM) turnover. This scheme is basically followed within the COST Action ES 1406 (KEYSOM). Activities in A) and B) run parallel, followed by C) which ends with an improved SOM model. Exemplarily shown are scenarios for two biomes; the shaded miniature displays a different scale for one of them. Further explanations see text.
